# Supplementary material
Source: PubMed Central journal article supplement (PMC4177007)
Supplement: NIHMS618165-supplement-3.pdf [file NIHMS618165-supplement-3.pdf]

Corresponding Author: Ming Hsu

Manuscript Number: NN-A47905

Manuscript Type: Brief Communication

# Main Figures: 3

# Supplementary Figures: 9

# Supplementary Tables: 4

# Supplementary Videos: 0

## Reporting Checklist for Nature Neuroscience

This checklist is used to ensure good reporting standards and to improve the reproducibility of published results. For more information, please read [Reporting Life Sciences Research](#).

Please note that in the event of publication, it is mandatory that authors include all relevant methodological and statistical information in the manuscript.

### ► Statistics reporting, by figure

- Please specify the following information for each panel reporting quantitative data, and where each item is reported.
- Each figure legend should ideally contain an exact sample size (n) for each experimental group/condition, where n is an exact number and not a range, a clear definition of how n is defined (for example x cells from x slices from x animals from x litters, collected over x days), a description of the statistical test used, the results of the tests, any descriptive statistics and clearly defined error bars if applicable.
- For any experiments using custom statistics, please indicate the test used and stats obtained for each experiment.
- Each figure legend should include a statement of how many times the experiment shown was replicated in the lab; the details of sample collection should be sufficiently clear so that the replicability of the experiment is obvious to the reader.
- For experiments reported in the text but not in the figures, please use the page number instead of the figure number.

**Note:** Mean and standard deviation are not appropriate on small samples, and plotting independent data points is usually more informative. When technical replicates are reported, error and significance measures reflect the experimental variability and not the variability of the biological process; it is misleading not to state this clearly.

|         | TEST USED     |                                              | n             |              |                                                                | DESCRIPTIVE STATS (AVERAGE, VARIANCE) |                             | P VALUE       |             | DEGREES OF FREEDOM & F/t/z/R/ETC VALUE |                 |               |
|---------|---------------|----------------------------------------------|---------------|--------------|----------------------------------------------------------------|---------------------------------------|-----------------------------|---------------|-------------|----------------------------------------|-----------------|---------------|
|         | FIGURE NUMBER | WHICH TEST?                                  | PAGE          | EXACT VALUE  | DEFINED?                                                       | PAGE                                  | REPORTED?                   | PAGE          | EXACT VALUE | PAGE                                   | VALUE           | PAGE          |
| example | 1a            | one-way ANOVA                                | 4             | 9, 9, 10, 15 | mice from at least 3 litters/group                             | 4                                     | error bars are mean +/- SEM | 4             | p = 0.044   | 4                                      | F(3, 36) = 2.97 | 4             |
| example | results, pg 6 | unpaired t-test                              | 6             | 15           | slices from 10 mice                                            | 6                                     | error bars are mean +/- SEM | 6             | p = 0.0006  | 6                                      | t(28) = 2.808   | 6             |
| +       | Fig 2B        | Wilcoxon signed rank test for paired samples | p1 ms; Fig 2B | 324,324      | number of observations in the Choice/Message condition from HC | p1 ms; Fig 2B                         | mean +/- S.E.M              | p1 ms; Fig 2B | p=2.2e-16   | p1 ms; Fig 2B                          | W=1528          | p1 ms; Fig 2B |

|               |             | TEST USED     |             | n                                                                                |               |                | DESCRIPTIVE STATS (AVERAGE, VARIANCE) |                                      | P VALUE       |                       | DEGREES OF FREEDOM & F/t/z/R/ETC VALUE |  |
|---------------|-------------|---------------|-------------|----------------------------------------------------------------------------------|---------------|----------------|---------------------------------------|--------------------------------------|---------------|-----------------------|----------------------------------------|--|
| FIGURE NUMBER | WHICH TEST? | PAGE          | EXACT VALUE | DEFINED?                                                                         | PAGE          | REPORTED?      | PAGE                                  | EXACT VALUE                          | PAGE          | VALUE                 | PAGE                                   |  |
| +<br>-        | Fig 2B      | p1 ms; Fig 2B | 474,474     | number of observations in the Choice/Message condition for all subjects subjects | p1 ms; Fig 2B | mean +/- S.E.M | p1 ms; Fig 2B                         | p = 2.2e-16                          | p1 ms; Fig 2B | V = 2198              | p1 ms; Fig 2B                          |  |
| +<br>-        | Fig 2B      | p1 ms; Fig 2B | 648,132,168 | number of observations in all conditions from HC/DLPFC/OFC                       | p1 ms; Fig 2B | mean +/- S.E.M | p1 ms; Fig 2B                         | p=0.0006159                          | p1 ms; Fig 2B | $\chi^2(2) = 14.7849$ | p1 ms; Fig 2B                          |  |
| +<br>-        | Fig 2B      | p1 ms; Fig 2B | 648,132     | number of observations in all conditions from HC/DLPFC                           | p1 ms; Fig 2B | mean +/- S.E.M | p1 ms; Fig 2B                         | p=0.00065, Bonferroni corrected      | p1 ms; Fig 2B | W=51207.5             | p1 ms; Fig 2B                          |  |
| +<br>-        | Fig 2B      | p1 ms; Fig 2B | 324,66,84   | number of observations for paired difference in amount given from HC/DLPFC/OFC   | p1 ms; Fig 2B | mean +/- S.E.M | p1 ms; Fig 2B                         | p = 0.0006185                        | p1 ms; Fig 2B | $\chi^2(2) = 14.7764$ | p1 ms; Fig 2B                          |  |
| +<br>-        | Fig 2B      | p1 ms; Fig 2B | 324,66      | number of observations for paired difference in amount given from HC/DLPFC       | p1 ms; Fig 2B | mean +/- S.E.M | p1 ms; Fig 2B                         | p = 0.00115, Bonferroni corrected    | p1 ms; Fig 2B | W = 13439             | p1 ms; Fig 2B                          |  |
| +<br>-        | Fig 2B      | p1 ms; Fig 2B | 66,84       | number of observations for paired difference in amount given from DLPFC/OFC      | p1 ms; Fig 2B | mean +/- S.E.M | p1 ms; Fig 2B                         | p = 0.00025, Bonferroni corrected    | p1 ms; Fig 2B | W = 3660.5            | p1 ms; Fig 2B                          |  |
| +<br>-        | Fig 2B      | p1 ms; Fig 2B | 324,84      | number of observations for paired difference in amount given from HC/OFC         | p1 ms; Fig 2B | mean +/- S.E.M | p1 ms; Fig 2B                         | p = 1.00 Bonferroni corrected        | p1 ms; Fig 2B | W = 14024             | p1 ms; Fig 2B                          |  |
| +<br>-        | Fig 2B      | p1 ms; Fig 2B | 324,66,84   | number of observations in Choice condition from HC/DLPFC/OFC                     | p1 ms; Fig 2B | mean +/- S.E.M | p1 ms; Fig 2B                         | p = 0.1489                           | p1 ms; Fig 2B | $\chi^2(2) = 3.8086$  | p1 ms; Fig 2B                          |  |
| +<br>-        | Fig 2B      | p1 ms; Fig 2B | 324,66,84   | number of observations in Message condition from HC/DLPFC/OFC                    | p1 ms; Fig 2B | mean +/- S.E.M | p1 ms; Fig 2B                         | p = 0.0001914                        | p1 ms; Fig 2B | $\chi^2(2) = 17.1228$ | p1 ms; Fig 2B                          |  |
| +<br>-        | Fig 2B      | p1 ms; Fig 2B | 324,66      | number of observations in Message condition from HC/DLPFC                        | p1 ms; Fig 2B | mean +/- S.E.M | p1 ms; Fig 2B                         | p = 0.00010473, Bonferroni corrected | p1 ms; Fig 2B | W = 14094             | p1 ms; Fig 2B                          |  |
| +<br>-        | Fig 2B      | p1 ms; Fig 2B | 66,84       | number of observations in Message condition from DLPFC/OFC                       | p1 ms; Fig 2B | mean +/- S.E.M | p1 ms; Fig 2B                         | p = 0.019578, Bonferroni corrected   | p1 ms; Fig 2B | W = 2074              | p1 ms; Fig 2B                          |  |
| +<br>-        | Fig 2B      | p1 ms; Fig 2B | 324,84      | number of observations in Message condition from HC/OFC                          | p1 ms; Fig 2B | mean +/- S.E.M | p1 ms; Fig 2B                         | p = 1.0, Bonferroni corrected        | p1 ms; Fig 2B | W = 14485             | p1 ms; Fig 2B                          |  |
| +<br>-        | Fig 2C, top | p2 ms; Fig 2C | 270,54,70   | number of observations in conflict trails from HC/DLPFC/OFC                      | p2 ms; Fig 2C | mean +/- S.E.M | p2 ms; Fig 2C                         | p= 0.0004998                         | p2 ms; Fig 2C | NA                    | p2 ms; Fig 2C                          |  |

|        |                           |                                                   |                           |           |                                                                                         |                           |                |                           |                                   |                           |                       |                           |
|--------|---------------------------|---------------------------------------------------|---------------------------|-----------|-----------------------------------------------------------------------------------------|---------------------------|----------------|---------------------------|-----------------------------------|---------------------------|-----------------------|---------------------------|
| +<br>- | Fig 2C, top               | Pairwise comparisons using Fisher's exact test    | p2 ms; Fig 2C             | 270,54    | number of observations in conflict trails from HC/DLPFC                                 | p2 ms; Fig 2C             | mean +/- S.E.M | p2 ms; Fig 2C             | p=6.471e-11, Bonferroni corrected | p2 ms; Fig 2C             | NA                    | p2 ms; Fig 2C             |
| +<br>- | Fig 2C, top               | Pairwise comparisons using Fisher's exact test    | p2 ms; Fig 2C             | 54,270    | number of observations in conflict trails from DLPFC/OFC                                | p2 ms; Fig 2C             | mean +/- S.E.M | p2 ms; Fig 2C             | p=5.808e-05, Bonferroni corrected | p2 ms; Fig 2C             | NA                    | p2 ms; Fig 2C             |
| +<br>- | Fig 2C, top               | Pairwise comparisons using Fisher's exact test    | p2 ms; Fig 2C             | 270,70    | number of observations in conflict trails in Message condition from HC/OFC              | p2 ms; Fig 2C             | mean +/- S.E.M | p2 ms; Fig 2C             | p = 0.4929, Bonferroni corrected  | p2 ms; Fig 2C             | NA                    | p2 ms; Fig 2C             |
| +<br>- | Fig 2C bottom             | Fisher's exact test                               | p2 ms; Fig 2C             | 54,12,14  | number of observations in no conflict trails in Message condition from HC /DLPFC/ OFC   | p2 ms; Fig 2C             | mean +/- S.E.M | p2 ms; Fig 2C             | p = 0.2524                        | p2 ms; Fig 2C             | NA                    | p2 ms; Fig 2C             |
| +<br>- | par 1, p14,SI             | Kruskal-Wallis test                               | par 1, p14, SI            | 324,54,84 | number of observations in Choice condition from HC /IDL PFC/ OFC                        | par 1, p14, SI            | mean +/- S.E.M | par 1, p14, SI            | p = 0.1352                        | par 1, p14, SI            | $\chi^2(2) = 4.0018$  | par 1, p14, SI            |
| +<br>- | Supplementary table 3, SI | Kruskal-Wallis test                               | Supplementary table 3, SI | 324,54,84 | number of observations in Message condition from HC /IDL PFC/ OFC                       | Supplementary table 3, SI | mean +/- S.E.M | Supplementary table 3, SI | p = 0.0002814                     | Supplementary table 3, SI | $\chi^2(2) = 16.3513$ | Supplementary table 3, SI |
| +<br>- | Supplementary table 3, SI | Kruskal-Wallis test                               | Supplementary table 3, SI | 324,54,84 | number of observations in paired difference across two conditions from HC /IDL PFC/ OFC | Supplementary table 3, SI | mean +/- S.E.M | Supplementary table 3, SI | p = 0.001225                      | Supplementary table 3, SI | $\chi^2(2) = 13.4091$ | Supplementary table 3, SI |
| +<br>- | Supplementary table 3, SI | Pairwise comparisons using Wilcoxon rank sum test | Supplementary table 3, SI | 324,54    | number of observations in paired difference across two conditions from HC /IDL PFC      | Supplementary table 3, SI | mean +/- S.E.M | Supplementary table 3, SI | p = 0.0021, Bonferroni corrected  | Supplementary table 3, SI | W = 11462             | Supplementary table 3, SI |
| +<br>- | Supplementary table 3, SI | Pairwise comparisons using Wilcoxon rank sum test | Supplementary table 3, SI | 54,84     | number of observations in paired difference across two conditions from IDLPFC/OFC       | Supplementary table 3, SI | mean +/- S.E.M | Supplementary table 3, SI | p=0.0004, Bonferroni corrected    | Supplementary table 3, SI | W = 3122              | Supplementary table 3, SI |
| +<br>- | Supplementary table 3, SI | Wilcoxon rank sum test                            | Supplementary table 3, SI | 54,12     | number of observations in Choice condition from IDLPFC/ rDLPFC                          | Supplementary table 3, SI | mean +/- S.E.M | Supplementary table 3, SI | p = 0.55                          | Supplementary table 3, SI | W = 249.5             | Supplementary table 3, SI |
| +<br>- | Supplementary table 3, SI | Wilcoxon rank sum test                            | Supplementary table 3, SI | 54,12     | number of observations in Message condition from IDLPFC/ rDLPFC                         | Supplementary table 3, SI | mean +/- S.E.M | Supplementary table 3, SI | p = 0.173                         | Supplementary table 3, SI | W = 210.5             | Supplementary table 3, SI |

|        |                           |                                                |                |           |                                                                                               |                |                                              |                |                                      |                |                           |                |
|--------|---------------------------|------------------------------------------------|----------------|-----------|-----------------------------------------------------------------------------------------------|----------------|----------------------------------------------|----------------|--------------------------------------|----------------|---------------------------|----------------|
| +<br>- | Supplementary table 3, SI | Wilcoxon rank sum test                         | par 1, p14, SI | 54,12     | number of observations in paired difference from IDLPFC/rDLPFC                                | par 1, p14, SI | mean +/- S.E.M                               | par 1, p14, SI | p = 1                                | par 1, p14, SI | W = 280                   | par 1, p14, SI |
| +<br>- | Supplementary Figure 6    | Fisher's exact test                            | p5, ms; p7, SI | 324,66,84 | number of observation pairs from HC/DLPFC/OFC                                                 | p5, ms; p7, SI | mean +/- S.E.M                               | p5, ms; p7, SI | p= 0.0004998                         | p5, ms; p7, SI | NA                        | p5, ms; p7, SI |
| +<br>- | Supplementary Figure 6    | Pairwise comparisons using Fisher's exact test | p5, ms; p7, SI | 324,66    | number of observation pairs from HC/DLPFC                                                     | p5, ms; p7, SI | mean +/- S.E.M                               | p5, ms; p7, SI | p = 0.00000135, Bonferroni corrected | p5, ms; p7, SI | NA                        | p5, ms; p7, SI |
| +<br>- | Supplementary Figure 6    | Pairwise comparisons using Fisher's exact test | p5, ms; p7, SI | 66,84     | number of observation pairs from DLPFC/OFC                                                    | p5, ms; p7, SI | mean +/- S.E.M                               | p5, ms; p7, SI | p=0.0023343, Bonferroni corrected    | p5, ms; p7, SI | NA                        | p5, ms; p7, SI |
| +<br>- | Fig 3A                    | log likelihood ratio test                      | p2, ms; Fig3 A | 200       | bootstap sample for DLPFC                                                                     | p2, ms; Fig3 A | estimated parameter values                   | p2, ms; Fig3 A | p=0.5908494                          | p2, ms; Fig3 A | $\chi^2(1) = 0.289019788$ | p2, ms; Fig3 A |
| +<br>- | Fig 3A                    | log likelihood ratio test                      | p2, ms; Fig3 A | 200       | bootstap sample for OFC                                                                       | p2, ms; Fig3 A | estimated parameter values                   | p2, ms; Fig3 A | p=1.070101e-05                       | p2, ms; Fig3 A | $\chi^2(1) = 19.3820154$  | p2, ms; Fig3 A |
| +<br>- | Fig 3A                    | log likelihood ratio test                      | p2, ms; Fig3 A | 200       | bootstap sample for HC                                                                        | p2, ms; Fig3 A | estimated parameter values                   | p2, ms; Fig3 A | p=1.776357e-15                       | p2, ms; Fig3 A | $\chi^2(1) = 63.3455261$  | p2, ms; Fig3 A |
| +<br>- | Fig 3B                    | one sample t test                              | p2, ms; Fig3 B | 200       | bootstap sample for DLPFC                                                                     | p2, ms; Fig3 B | estimated mean +/- bootstrap standard errors | p2, ms; Fig3 B | p=0.4865                             | p2, ms; Fig3 B | t(199)= 0.6972            | p2, ms; Fig3 B |
| +<br>- | Fig 3B                    | one sample t test                              | p2, ms; Fig3 B | 200       | bootstap sample for OFC                                                                       | p2, ms; Fig3 B | estimated mean +/- bootstrap standard errors | p2, ms; Fig3 B | p=9.909e-05                          | p2, ms; Fig3 B | t(199)=3.973              | p2, ms; Fig3 B |
| +<br>- | Fig 3B                    | one sample t test                              | p2, ms; Fig3 B | 200       | bootstap sample for HC                                                                        | p2, ms; Fig3 B | estimated mean +/- bootstrap standard errors | p2, ms; Fig3 B | p=7.327e-11                          | p2, ms; Fig3 B | t(199)=6.886              | p2, ms; Fig3 B |
| +<br>- | Supplementary Fig. 3A top | Kruskal-Wallis test                            | p4, SI         | 66,132    | number of observations in Choice condition from DLPFC/age-matched DLPFC healthy controls      | p4, SI         | mean +/- S.E.M                               | p4, SI         | p = 0.7397                           | p4, SI         | $\chi^2(1) = 0.1104$      | p4, SI         |
| +<br>- | Supplementary Fig. 3A top | Kruskal-Wallis test                            | p4, SI         | 66,132    | number of observations in the Message condition from DLPFC/age-matched DLPFC healthy controls | p4, SI         | mean +/- S.E.M                               | p4, SI         | p = 0.0008698                        | p4, SI         | $\chi^2(1) = 11.0861$     | p4, SI         |
| +<br>- | Supplementary Fig. 3A top | Kruskal-Wallis test                            | p4, SI         | 66,132    | number of observation pairs from DLPFC/age-matched DLPFC healthy controls                     | p4, SI         | mean +/- S.E.M                               | p4, SI         | p = 0.000706                         | p4, SI         | $\chi^2(1) = 11.4734$     | p4, SI         |

|        |                              |                     |        |         |                                                                                                         |        |                  |        |            |        |                      |        |
|--------|------------------------------|---------------------|--------|---------|---------------------------------------------------------------------------------------------------------|--------|------------------|--------|------------|--------|----------------------|--------|
| +<br>- | Supplementary Fig. 3A bottom | Kruskal-Wallis test | p4, SI | 84, 192 | number of observations in the Message condition from OFC/age-matched OFC healthy controls               | p4, SI | mean +/- S.E.M   | p4, SI | p = 0.2597 | p4, SI | $\chi^2(1) = 1.2703$ | p4, SI |
| +<br>- | Supplementary Fig. 3A bottom | Kruskal-Wallis test | p4, SI | 84, 192 | number of observation pairs from OFC/age-matched OFC healthy controls                                   | p4, SI | mean +/- S.E.M   | p4, SI | p = 0.5437 | p4, SI | $\chi^2(1) = 0.3688$ | p4, SI |
| +<br>- | Supplementary Fig. 3B top    | Fisher's exact test | p4, SI | 54,110  | number of observation in Conflict trials in the Message condition from DLPFC/age-matched DLPFC controls | p4, SI | mean +/- S.E.M   | p4, SI | p = 0.0165 | p4, SI | NA                   | p4, SI |
| +<br>- | Supplementary Fig. 3B bottom | Fisher's exact test | p4, SI | 12,22   | number of observation in No Conflict trials in the Message condition from OFC/age-matched OFC controls  | p4, SI | mean +/- S.E.M   | p4, SI | p = 1      | p4, SI | NA                   | p4, SI |
| +<br>- | Supplementary Fig. 5A        | linear regression   | p6, SI | 66, 324 | number of observation pairs from DLPFC patients, number of observation pairs from HC                    | p6, SI | regression slope | p6, SI | p=.006     | p6, SI | beta =.37            | p6, SI |
| +<br>- | Supplementary Fig. 5B        | linear regression   | p6, SI | 84, 324 | number of observation pairs from OFC patients, number of observation pairs from HC                      | p6, SI | regression slope | p6, SI | p=2.44E-06 | p6, SI | beta= .85            | p6, SI |
| +<br>- | Supplementary Fig. 7         | one sample t test   | p8, SI | 25      | number of observations for relative emotion rating between Choice task and impersonal task              | p8, SI | mean +/- S.E.M   | p8, SI | p = .00000 | p8, SI | t(24) = 9.05         | p8, SI |
| +<br>- | Supplementary Fig. 7         | one sample t test   | p8, SI | 25      | number of observations for relative emotion rating between Choice task and low-conflict personal task   | p8, SI | mean +/- S.E.M   | p8, SI | p = .00000 | p8, SI | t(24) = 7.58         | p8, SI |
| +<br>- | Supplementary Fig. 7         | one sample t test   | p8, SI | 25      | number of observations for relative emotion rating between Choice task and high-conflict personal task  | p8, SI | mean +/- S.E.M   | p8, SI | p = .00000 | p8, SI | t(24) = 8.16         | p8, SI |
| +<br>- | Supplementary Fig. 7         | one sample t test   | p8, SI | 26      | number of observations for relative emotion rating between Message task and impersonal task             | p8, SI | mean +/- S.E.M   | p8, SI | p = .00000 | p8, SI | t(25) = 12.74        | p8, SI |

|        |                          |                                             |                          |             |                                                                                                                                                          |                          |                 |                          |                                     |                          |                                                   |                          |
|--------|--------------------------|---------------------------------------------|--------------------------|-------------|----------------------------------------------------------------------------------------------------------------------------------------------------------|--------------------------|-----------------|--------------------------|-------------------------------------|--------------------------|---------------------------------------------------|--------------------------|
| +<br>- | Supplementary Fig. 7     | one sample t test                           | p8, SI                   | 26          | number of observations for relative emotion rating between Message task and low-conflict personal task                                                   | p8, SI                   | mean +/- S.E.M  | p8, SI                   | p = .00000                          | p8, SI                   | t(25)= 15.89                                      | p8, SI                   |
| +<br>- | Supplementary Fig. 7     | one sample t test                           | p8, SI                   | 26          | number of observations for relative emotion rating between Message task and high-conflict personal task                                                  | p8, SI                   | mean +/- S.E.M  | p8, SI                   | p = .00000                          | p8, SI                   | t(25) = 14.37                                     | p8, SI                   |
| +<br>- | Supplementary Fig. 8     | two-way ANOVA                               | p9, SI                   | 44,45,39,35 | number of observations for Choice-100/ Choice-80/ Message-100/ Message-80                                                                                | p9, SI                   | mean +/- S.E.M  | p9, SI                   | p = 0.0000077<br>p = .18<br>p = .84 | p9, SI                   | F(1,159)=32.98<br>F(1,159)=1.86<br>F(1,159)= 0.43 | p9, SI                   |
| +<br>- | Supplementary Fig. 8     | pairwise comparison using two sample t test | p9, SI                   | 44,39       | number of observations for Choice-100/ Message-100                                                                                                       | p9, SI                   | mean +/- S.E.M  | p9, SI                   | p=0.0013                            | p9, SI                   | t(89) = 2.86                                      | p9, SI                   |
| +<br>- | Supplementary Fig. 8     | pairwise comparison using two sample t test | p9, SI                   | 45,35       | number of observations for Choice-80/ Message-80                                                                                                         | p9, SI                   | mean +/- S.E.M  | p9, SI                   | p = 0.00000                         | p9, SI                   | t(74) = 5.31                                      | p9, SI                   |
| +<br>- | Supplementary Fig. 9     | Chi-square test                             | p10, SI                  | 225,42,81   | number of observations in Choice condition from Gneezy 2005/task with real payoff/task with hypothetical payoff                                          | p10, SI                  | mean +/- S.E.   | p10, SI                  | p = 0.8115                          | p10, SI                  | $\chi^2(2) = 0.4178$                              | p10, SI                  |
| +<br>- | Supplementary Fig. 9     | Chi-square test                             | p10, SI                  | 225,42,81   | number of observations in Message condition from Gneezy 2005/task with real payoff/task with hypothetical payoff                                         | p10, SI                  | mean +/- S.E.   | p10, SI                  | p = 0.3983                          | p10, SI                  | $\chi^2(2) = 1.8413$                              | p10, SI                  |
| +<br>- | Supplementary Fig. 9     | two-sample t test                           | p10, SI                  | 42,81       | number of observations in paired difference in amount given between Message and Choice condition in task with real payoff/ task with hypothetical payoff | p10, SI                  | mean +/- S.E.M. | p10, SI                  | p = 0.5531                          | p10, SI                  | t(39) = 0.598290                                  | p10, SI                  |
| +<br>- | par1, p1, Online Methods | Kruskal-Wallis test                         | par1, p1, Online Methods | 324,84,90   | number of observations in Choice condition from HC/OFC/ DLPFC(including the excluded DLPFC patient who participated twice)                               | par1, p1, Online Methods | NA              | par1, p1, Online Methods | p = 0.06603                         | par1, p1, Online Methods | $\chi^2(2) = 5.4352$                              | par1, p1, Online Methods |

|        |                          |                                 |                          |            |                                                                                                                                   |                          |    |                          |                                        |                          |                                                |                          |
|--------|--------------------------|---------------------------------|--------------------------|------------|-----------------------------------------------------------------------------------------------------------------------------------|--------------------------|----|--------------------------|----------------------------------------|--------------------------|------------------------------------------------|--------------------------|
| +<br>- | par1, p1, Online Methods | Kruskal-Wallis test             | par1, p1, Online Methods | 324,84,90  | number of observations in Message condition from HC/OFC/DLPFC(including the excluded DLPFC patient who participated twice)        | par1, p1, Online Methods | NA | par1, p1, Online Methods | p = .00000486                          | par1, p1, Online Methods | $\chi^2(2) = 24.4699$                          | par1, p1, Online Methods |
| +<br>- | par1, p1, Online Methods | Kruskal-Wallis test             | par1, p1, Online Methods | 324,84,90  | number of observation pairs from HC/OFC/DLPFC(including the excluded DLPFC patient who participated twice)                        | par1, p1, Online Methods | NA | par1, p1, Online Methods | p = 0.0002292                          | par1, p1, Online Methods | $\chi^2(2) = 16.7621$                          | par1, p1, Online Methods |
| +<br>- | par1, p1, Online Methods | chi-square test for proportions | par1, p1, Online Methods | 70,74      | number of observations in conflict trails from OFC/DLPFC patients ( with the excluded DLPFC patient who participated twice),      | par1, p1, Online Methods | NA | par1, p1, Online Methods | p=0.01102                              | par1, p1, Online Methods | $\chi^2(1) = 6.4619$                           | par1, p1, Online Methods |
| +<br>- | par1, p1, Online Methods | chi-square test for proportions | par1, p1, Online Methods | 270,74     | number of observations in conflict trails from HC/DLPFC patients ( with the excluded DLPFC patient who participated twice),       | par1, p1, Online Methods | NA | par1, p1, Online Methods | p = 2.616e-07                          | par1, p1, Online Methods | $\chi^2(1) = 26.5143$                          | par1, p1, Online Methods |
| +<br>- | par1, p1, Online Methods | chi-square test for proportions | par1, p1, Online Methods | 54,14,16   | number of observations in no conflict trails from HC/OFC/DLPFC patients ( with the excluded DLPFC patient who participated twice) | par1, p1, Online Methods | NA | par1, p1, Online Methods | p =0.9673                              | par1, p1, Online Methods | $\chi^2(2) = 0.0665$                           | par1, p1, Online Methods |
| +<br>- | par5, p1, main text      | repeated measure 2 by 3 ANOVA   | par5, p1, main text      | 2,3,40     | number of condition, number of cohorts, and number of subjects                                                                    | par5, p1, main text      | NA | par5, p1, main text      | p = 1.3e-10 ; p= 1.18e-09 ; p= 0.00215 | par5, p1, main text      | F(1,37)=77.54; F(2,37) = 37.70; F(2,37) = 7.30 | par5, p1, main text      |
| +<br>- | par5, p1, main text      | One-way ANOVA                   | par5, p1, main text      | 3,40       | number of cohorts, and number of subjects                                                                                         | par5, p1, main text      | NA | p13, SI                  | p = 0.2045                             | p13, SI                  | F(1,37) = 1.6575                               | par5, p1, main text      |
| +<br>- | par5, p1, main text      | One-way ANOVA                   | par5, p1, main text      | 3,40       | number of cohorts, and number of subjects                                                                                         | par5, p1, main text      | NA | par5, p1, main text      | p = 0.0048                             | par5, p1, main text      | F(2,37) = 6.192                                | par5, p1, main text      |
| +<br>- | par5, p1, main text      | Chi-square test for proportions | par5, p1, main text      | 270,54,70  | number of observations in conflict trails under Message condition from HC/DLPFC/OFC                                               | par5, p1, main text      | NA | par5, p1, main text      | p = 4.316e-12                          | par5, p1, main text      | $\chi^2(2) = 52.3374$                          | par5, p1, main text      |
| +<br>- | par5, p1, main text      | Chi-square test for proportions | par5, p1, main text      | 54, 12, 14 | number of observations in no conflict trails under Message condition from HC/DLPFC/OFC                                            | par5, p1, main text      | NA | par5, p1, main text      | p = 0.9731                             | par5, p1, main text      | $\chi^2(2) = 0.0545$                           | par5, p1, main text      |

|        |                     |                                 |                     |           |                                               |                     |    |                     |               |                     |                       |                     |
|--------|---------------------|---------------------------------|---------------------|-----------|-----------------------------------------------|---------------------|----|---------------------|---------------|---------------------|-----------------------|---------------------|
| +<br>- | par5, p1, main text | Chi-square test for proportions | par5, p1, main text | 324,66,84 | number of observation pairs from HC/DLPFC/OFC | par5, p1, main text | NA | par5, p1, main text | p = 8.795e-06 | par5, p1, main text | $\chi^2(2) = 23.2827$ | par5, p1, main text |
|--------|---------------------|---------------------------------|---------------------|-----------|-----------------------------------------------|---------------------|----|---------------------|---------------|---------------------|-----------------------|---------------------|

## ▶ Representative figures

1. Are any representative images shown (including Western blots and immunohistochemistry/staining) in the paper?

If so, what figure(s)?

2. For each representative image, is there a clear statement of how many times this experiment was successfully repeated and a discussion of any limitations in repeatability?

If so, on what page(s) is this reported?

## ▶ Statistics and general methods

1. Is there a justification of the sample size?

If so, how was it justified?

On what page(s)?

Even if no sample size calculation was performed, authors should report why the sample size is adequate to measure their effect size.

The sample size for lesion and control cohorts has been shown to produce robust behavioral effects in multiple prior studies conducted in our research program (Voytek et al., 2010; Voytek et al., 2010; Gehring et al., 2000). This is not surprising since reliable effects are obtained in monkey experiments with only 1 or 2 subjects if the neuroanatomy of the lesion is well controlled.

2. Are statistical tests justified as appropriate for every figure?

On what page(s)?

- a. If there is a section summarizing the statistical methods in the methods, is the statistical test for each experiment clearly defined?

yes.

- b. Do the data meet the assumptions of the specific statistical test you chose (e.g. normality for a parametric test)?

Where is this described?

We performed both parametric and non-parametric tests to account for possible violations of standard distributional assumptions. We included the compilation of all key statistical results in study using both parametric and non-parametric tests in Supplementary Table 3.

- c. Is there any estimate of variance within each group of data? Is the variance similar between groups that are being statistically compared?

Where is this described?

We performed fixed effect estimation to account for variance within each group.

- d. Are tests specified as one- or two-sided?

All tests are two-sided.

- e. Are there adjustments for multiple comparisons?

Yes, all pairwise comparisons are Bonferroni corrected.



|                                                                                                                                                                                                                                 |                                                                                                                                                                                                                                                                                                                                  |
|---------------------------------------------------------------------------------------------------------------------------------------------------------------------------------------------------------------------------------|----------------------------------------------------------------------------------------------------------------------------------------------------------------------------------------------------------------------------------------------------------------------------------------------------------------------------------|
| <p>3. Are criteria for excluding data points reported?<br/>Was this criterion established prior to data collection?<br/>On what page(s) is this described?</p>                                                                  | <p>Yes, it is reported as "One DLPFC lesion patient answered incorrectly on more than 50% of post instruction questionnaires, and was excluded from the study. In comparison no other subjects failed to answer fewer than 90% of the questions correctly." on page 2 of the main text and page i of the Online Methods. The</p> |
| <p>4. Define the method of randomization used to assign subjects (or samples) to the experimental groups and to collect and process data.<br/>If no randomization was used, state so.<br/>On what page(s) does this appear?</p> | <p>The order of our experimental conditions followed a predetermined pseudo randomization protocol to counter balance the ordering within each cohort.<br/><br/>Within each condition, the questions were randomly shuffled by the experimenter.<br/><br/>This is reported on page ii, online Methods.</p>                       |
| <p>5. Is a statement of the extent to which investigator knew the group allocation during the experiment and in assessing outcome included?<br/>If no blinding was done, state so.<br/>On what page(s)?</p>                     | <p>Experimenters knew whether the subjects were lesion patients or healthy controls when running the experiment.</p>                                                                                                                                                                                                             |
| <p>6. For experiments in live vertebrates, is a statement of compliance with ethical guidelines/regulations included?<br/>On what page(s)?</p>                                                                                  | <p>N.A.</p>                                                                                                                                                                                                                                                                                                                      |
| <p>7. Is the species of the animals used reported?<br/>On what page(s)?</p>                                                                                                                                                     |                                                                                                                                                                                                                                                                                                                                  |
| <p>8. Is the strain of the animals (including background strains of KO/transgenic animals used) reported?<br/>On what page(s)?</p>                                                                                              |                                                                                                                                                                                                                                                                                                                                  |
| <p>9. Is the sex of the animals/subjects used reported?<br/>On what page(s)?</p>                                                                                                                                                | <p>Yes. on page i, Online Methods.</p>                                                                                                                                                                                                                                                                                           |
| <p>10. Is the age of the animals/subjects reported?<br/>On what page(s)?</p>                                                                                                                                                    | <p>Yes. on page i, Online Methods.</p>                                                                                                                                                                                                                                                                                           |
| <p>11. For animals housed in a vivarium, is the light/dark cycle reported?<br/>On what page(s)?</p>                                                                                                                             |                                                                                                                                                                                                                                                                                                                                  |
| <p>12. For animals housed in a vivarium, is the housing group (i.e. number of animals per cage) reported?<br/>On what page(s)?</p>                                                                                              |                                                                                                                                                                                                                                                                                                                                  |
| <p>13. For behavioral experiments, is the time of day reported (e.g. light or dark cycle)?<br/>On what page(s)?</p>                                                                                                             |                                                                                                                                                                                                                                                                                                                                  |

14. Is the previous history of the animals/subjects (e.g. prior drug administration, surgery, behavioral testing) reported?

On what page(s)?

Etiology were reported on page i, Online Methods.

a. If multiple behavioral tests were conducted in the same group of animals, is this reported?

On what page(s)?

Yes, in the procedure section, Online Methods.

15. If any animals/subjects were excluded from analysis, is this reported?

On what page(s)?

Yes, it is reported on page i of Online Methods.

a. How were the criteria for exclusion defined?

Where is this described?

As reported on page i, Online Methods, one DLPFC lesion patient answered incorrectly on more than 50% of post instruction questionnaires, and was excluded from the study. In comparison no other subjects failed to answer fewer than 90% of the questions correctly.

b. Specify reasons for any discrepancy between the number of animals at the beginning and end of the study.

Where is this described?

## ► Reagents

1. Have antibodies been validated for use in the system under study (assay and species)?

a. Is antibody catalog number given?

On what page(s) does this appear?

b. Where were the validation data reported (citation, supplementary information, Antibodypedia)?

On what page(s) does this appear?

2. If cell lines were used to reflect the properties of a particular tissue or disease state, is their source identified?

On what page(s)?

a. Were they recently authenticated?

On what page(s) is this information reported?

## ► Data deposition

Data deposition in a public repository is mandatory for:

- Protein, DNA and RNA sequences
- Macromolecular structures
- Crystallographic data for small molecules
- Microarray data

Deposition is strongly recommended for many other datasets for which structured public repositories exist; more details on our data policy are available [here](#). We encourage the provision of other source data in supplementary information or in unstructured repositories such as [Figshare](#) and [Dryad](#).

- Are accession codes for deposit dates provided?

On what page(s)?

## ► Computer code/software

Any custom algorithm/software that is central to the methods must be supplied by the authors in a usable and readable form for readers at the time of publication. However, referees may ask for this information at any time during the review process.

- Identify all custom software or scripts that were required to conduct the study and where in the procedures each was used.

- Is computer source code/software provided with the paper or deposited in a public repository? Indicate in what form this is provided or how it can be obtained.

## ► Human subjects

- Which IRB approved the protocol?

Where is this stated?

- Is demographic information on all subjects provided?

On what page(s)?

- Is the number of human subjects, their age and sex clearly defined?

On what page(s)?

- Are the inclusion and exclusion criteria (if any) clearly specified?

On what page(s)?

- How well were the groups matched?

Where is this information described?

6. Is a statement confirming that informed consent was obtained from all subjects included?

On what page(s)?

Yes, as stated in page 3, paragrap2, informed consent was obtained as approved by the Internal Review Board at University of California, Berkeley.

7. For publication of patient photos, is a statement confirming that consent to publish was obtained included?

On what page(s)?

## ► fMRI studies

For papers reporting functional imaging (fMRI) results please ensure that these minimal reporting guidelines are met and that all this information is clearly provided in the methods:

1. Were any subjects scanned but then rejected for the analysis after the data was collected?

- a. If yes, is the number rejected and reasons for rejection described?

On what page(s)?

2. Is the number of blocks, trials or experimental units per session and/or subjects specified?

On what page(s)?

3. Is the length of each trial and interval between trials specified?

4. Is a blocked, event-related, or mixed design being used? If applicable, please specify the block length or how the event-related or mixed design was optimized.

5. Is the task design clearly described?

Where?

6. How was behavioral performance measured?

7. Is an ANOVA or factorial design being used?

8. For data acquisition, is a whole brain scan used?

If not, state area of acquisition.

- a. How was this region determined?

9. Is the field strength (in Tesla) of the MRI system stated?
- a. Is the pulse sequence type (gradient/spin echo, EPI/spiral) stated?
- b. Are the field-of-view, matrix size, slice thickness, and TE/TR/flip angle clearly stated?
10. Are the software and specific parameters (model/functions, smoothing kernel size if applicable, etc.) used for data processing and pre-processing clearly stated?
11. Is the coordinate space for the anatomical/functional imaging data clearly defined as subject/native space or standardized stereotaxic space, e.g., original Talairach, MNI305, ICBM152, etc? On what page(s)?
12. If there was data normalization/standardization to a specific space template, are the type of transformation (linear vs. nonlinear) used and image types being transformed clearly described? On what page(s)?
13. How were anatomical locations determined, e.g., via an automated labeling algorithm (AAL), standardized coordinate database (Talairach daemon), probabilistic atlases, etc.?
14. Were any additional regressors (behavioral covariates, motion etc) used?
15. Is the contrast construction clearly defined?
16. Is a mixed/random effects or fixed inference used?
- a. If fixed effects inference used, is this justified?
17. Were repeated measures used (multiple measurements per subject)?
- a. If so, are the method to account for within subject correlation and the assumptions made about variance clearly stated?
18. If the threshold used for inference and visualization in figures varies, is this clearly stated?
19. Are statistical inferences corrected for multiple comparisons?
- a. If not, is this labeled as uncorrected?

20. Are the results based on an ROI (region of interest) analysis?

a. If so, is the rationale clearly described?

b. How were the ROI's defined (functional vs anatomical localization)?

21. Is there correction for multiple comparisons within each voxel?

22. For cluster-wise significance, is the cluster-defining threshold and the corrected significance level defined?

## ► Additional comments

---

Additional Comments
